# Supplementary material for: Oncodrive-CIS: A Method to Reveal Likely Driver Genes Based on the Impact of Their Copy Number Changes on Expression
Source: PubMed Central journal article supplement (PMC3568145; doi:10.1371/journal.pone.0055489), 2013-02-08

Figure S4.

A

EIS normal

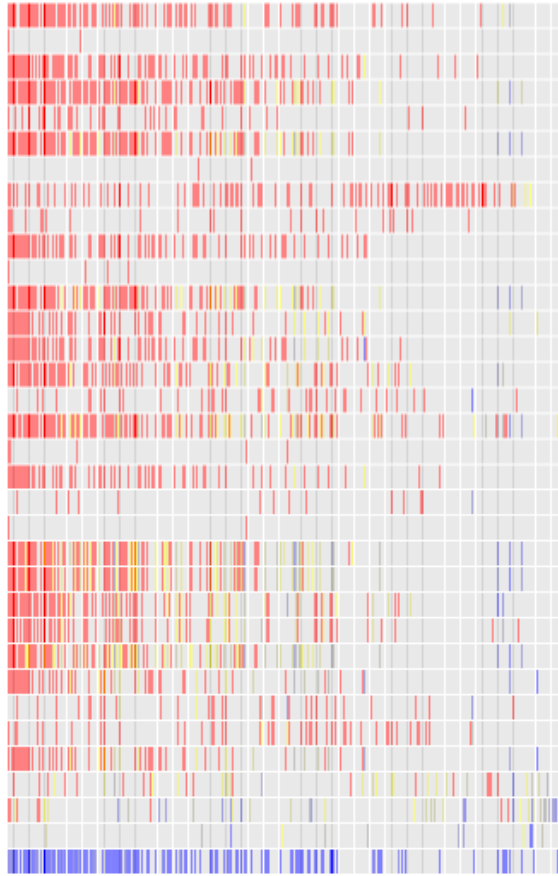

Onco-CIS  
Z normal

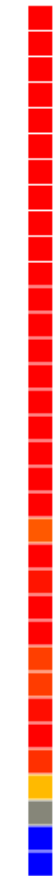

EIS values scale

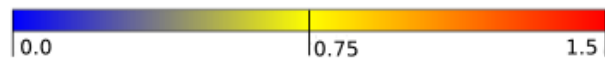

B

EIS tumor

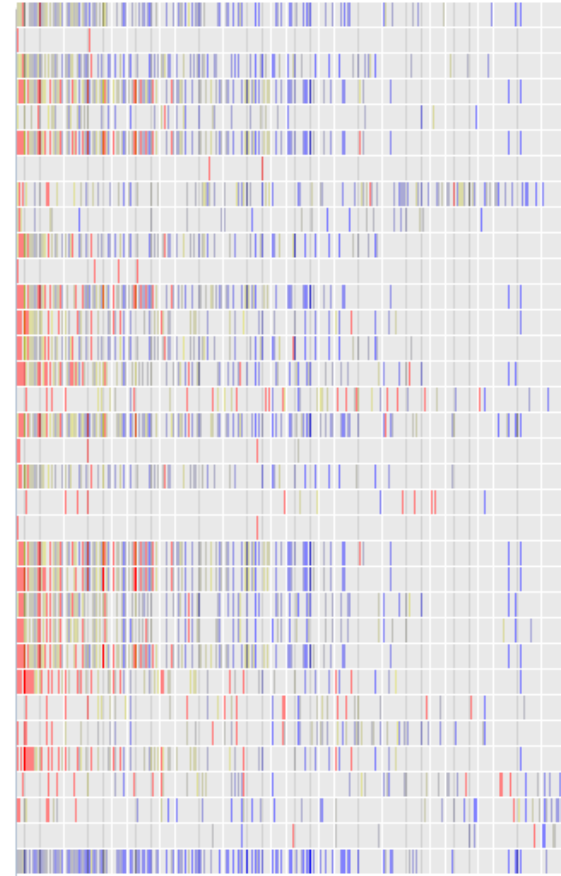

Onco-CIS  
Z tumor

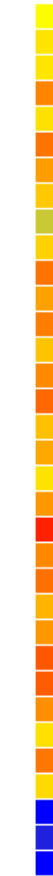

q values scale

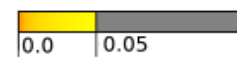

C

Onco-CIS  
Z combined

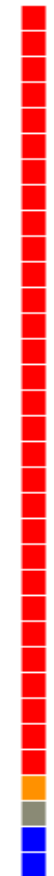

GISTIC q

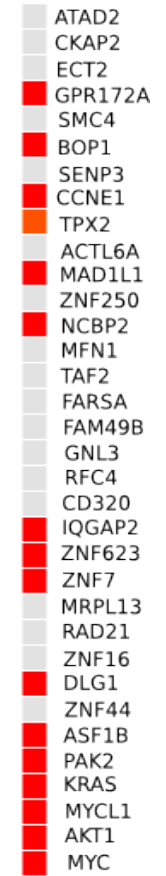

Z values scale

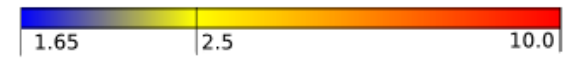

Supplement: pone.0055489.s004.pdf [file pone.0055489.s004.pdf]
