# Supplementary material for: Oncodrive-CIS: A Method to Reveal Likely Driver Genes Based on the Impact of Their Copy Number Changes on Expression
Source: PubMed Central journal article supplement (PMC3568145; doi:10.1371/journal.pone.0055489), 2013-02-08

Figure S5

A

EIS normal

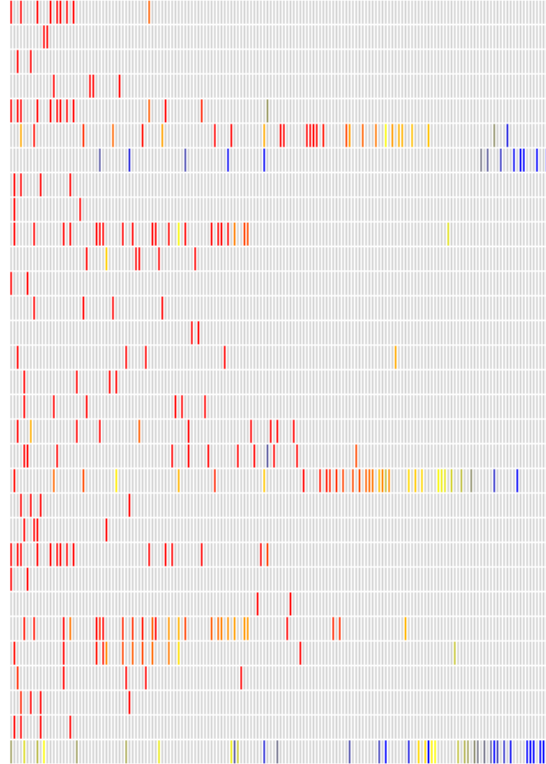

Onco-CIS  
Z normal

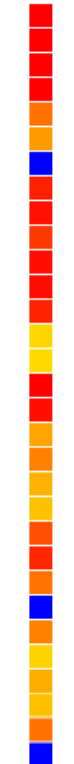

EIS values scale

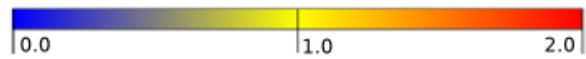

B

EIS tumor

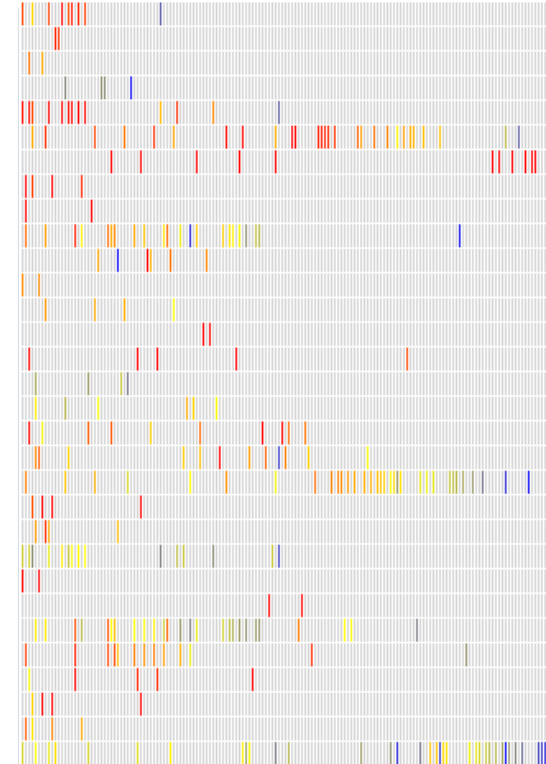

Onco-CIS  
Z tumor

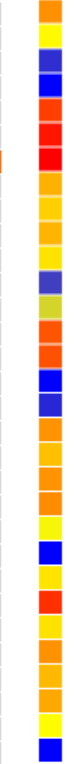

q values scale

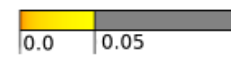

C

Onco-CIS  
Z combined

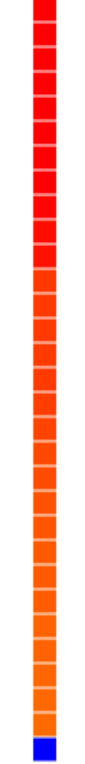

GISTIC q

- PPP2CB
- ZNF44
- GLTSCR2
- AGR2
- INTS9
- PTEN
- CDKN2A
- OXA1L
- MRPS2
- ATXN10
- CLUAP1
- TSPYL4
- CL0orf116
- EFHA1
- RIC8A
- ARHGAP10
- CES2
- SRP14
- MTMR9
- NF1
- NGDN
- NCOA4
- EPHX2
- TSPYL1
- RBM26
- PLXNB2
- POLDIP3
- AP2A2
- TM9SF1
- DAD1
- RB1

Z values scale

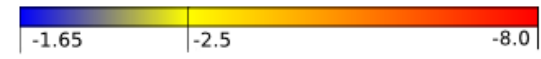

Supplement: pone.0055489.s005.pdf [file pone.0055489.s005.pdf]
