# Supplementary material for: Oncodrive-CIS: A Method to Reveal Likely Driver Genes Based on the Impact of Their Copy Number Changes on Expression
Source: PubMed Central journal article supplement (PMC3568145; doi:10.1371/journal.pone.0055489), 2013-02-08

**Figure S9.**

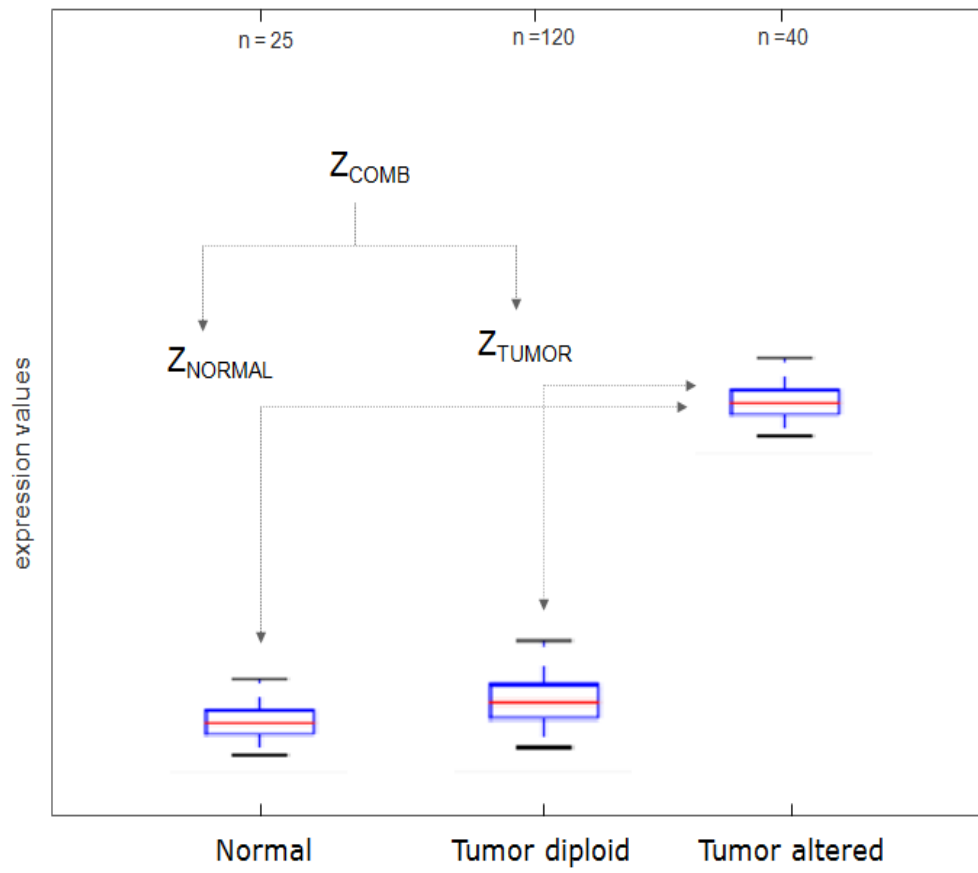

Supplement: pone.0055489.s009.pdf [file pone.0055489.s009.pdf]
