# Supplementary material for: Oncodrive-CIS: A Method to Reveal Likely Driver Genes Based on the Impact of Their Copy Number Changes on Expression
Source: PubMed Central journal article supplement (PMC3568145; doi:10.1371/journal.pone.0055489), 2013-02-08
Supplement: pone.0055489.s010.pdf [file pone.0055489.s010.pdf]

**Table S1.**

Mean  $\pm$  standard deviation obtained by Oncodrive-CIS benchmarking measurements (rows) across the 100 synthetic data sets generated for each of the simulation settings (columns). MCC means Matthew's correlation coefficient.

|             | n = 15<br>lineal  | n = 15<br>stepwise | n = 15<br>sigmoid | n = 100<br>lineal | n = 100<br>stepwise | n = 100<br>sigmoid |
|-------------|-------------------|--------------------|-------------------|-------------------|---------------------|--------------------|
| Sensitivity | 0.520 $\pm$ 0.021 | 0.490 $\pm$ 0.010  | 0.249 $\pm$ 0.008 | 0.851 $\pm$ 0.011 | 0.758 $\pm$ 0.004   | 0.569 $\pm$ 0.014  |
| Specificity | 0.975 $\pm$ 0.007 | 0.974 $\pm$ 0.001  | 0.969 $\pm$ 0.001 | 0.972 $\pm$ 0.001 | 0.967 $\pm$ 0.002   | 0.969 $\pm$ 0.001  |
| MCC         | 0.513 $\pm$ 0.018 | 0.501 $\pm$ 0.013  | 0.258 $\pm$ 0.011 | 0.745 $\pm$ 0.010 | 0.663 $\pm$ 0.009   | 0.536 $\pm$ 0.017  |
